# Supplementary material
Source: PubMed Central journal article supplement (PMC5740255)

**Supplemental Figure 1. Prevention protocol: western blot analysis for collagen IV and F4/80.**

Western blot analysis for collagen IV  $\alpha$ 1 chain (*Panel A*) and F4/80 (*Panel B*) protein levels in representative animals and relative band densitometry analysis in untreated and FL-926-16 (FL)-treated *db/m* control (Ctrl) and *db/db* diabetic (Diab) mice (mean $\pm$ SD; n=5 per group). The Y axis label "Relative level" indicates fold of mean value of Ctr (*db/m* control) mice. Post-hoc multiple comparison: \*p<0.05 vs Ctrl, †p<0.05 vs Diab.

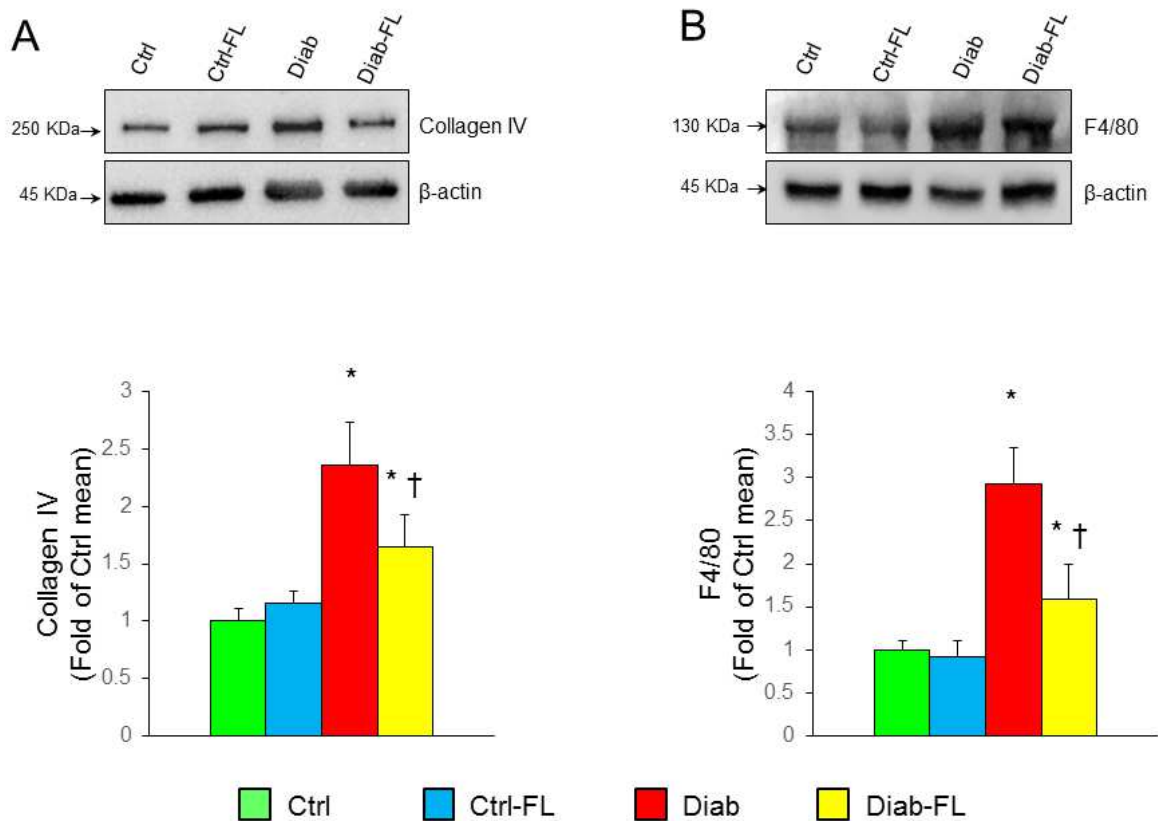

Supplement: BPH-175-53-s001.pdf [file BPH-175-53-s001.pdf]
