# Supplementary material
Source: PubMed Central journal article supplement (PMC5740255)
Supplement: BPH-175-53-s002.pdf [file BPH-175-53-s002.pdf]

**Supplemental Table 1. Assays used for qRT-PCR analysis.**

| <b>Assay</b>  | <b>Code</b>   |
|---------------|---------------|
| <i>Fnl</i>    | Mm00692666_m1 |
| <i>Col4a1</i> | Mm00802372_m1 |
| <i>Tgfb</i>   | Mm01178820_m1 |
| <i>Tnfa</i>   | Mm00443258_m1 |
| <i>Ccl2</i>   | Mm00441242_m1 |
| <i>Adgre1</i> | Mm00802529_m1 |
| <i>Nlrp3</i>  | Mm00840904_m1 |
| <i>Actb</i>   | Mm01205647_m1 |

qRT-PCR = quantitative RT-PCR.
